# Supplementary material
Source: publisher site journal article supplement (https://www.dovepress.com/article/245455)
Supplement: Supplementary file 1 [file get_supplementary_file.php]

# Supplemental figures

**Fig. S1:** **LSM from FibroTouch (FT) and LSM from FibroScan (FS) for each patient ordered by LSM-FS from lowest to highest.**

**Fig. S2:** **CAP from FibroScan (FS) and UAP from FibroTouch (FT) for each patient ordered by CAP-FS from lowest to highest.**
